# Supplementary material for: Partial root-zone drying combined with nitrogen treatments mitigates drought responses in rice
Source: Front Plant Sci. 2024 Apr 15;15:1381491. doi: 10.3389/fpls.2024.1381491 (PMC11056961; doi:10.3389/fpls.2024.1381491)
Supplement: Supplementary file 2 [file Table_2.xlsx]

## Sheet: Sheet1
Nutrient solution formulation for A0/N100
Elemental	Elemental concentration（mg/L）	Salt compounds used	Dosage of salt compounds（mg/L）
Macro-elements
N(Nitrate)	40.00	Ca(NO3)2·4H2O	337.69
P	10.00	NaH2PO4·2H2O	50.40
K	40.00	K2SO4	89.30
Ca	57.30	Ca(NO3)2·4H2O	337.69
Mg	40.00	MgSO4·7H2O	405.00
Trace element
Mn	0.50	MnCl2·4H2O	1500.00
Mo	0.05	Na2MoO4·2H2O	126.25
B	0.20	H3BO3	934.00
Zn	0.01	ZnSO4·7H2O	35.00
Cu	0.01	CuSO4·5H2O	31.00
