# Supplementary material for: Partial root-zone drying combined with nitrogen treatments mitigates drought responses in rice
Source: Front Plant Sci. 2024 Apr 15;15:1381491. doi: 10.3389/fpls.2024.1381491 (PMC11056961; doi:10.3389/fpls.2024.1381491)
Supplement: Supplementary file 4 [file Table_4.xlsx]

## Sheet: Sheet1
Treatment	Sample Name In the study	Rep.	Raw reads	Raw bases	Clean reads	Clean bases	Q20 rate	Q30 rate	GC content	Total read pair (bp)	Unique Mapped(%)	Multiple Mapped(%)	Unmapped(%)
PRD	PRD0/100	1	43392458	6508868700	43351916	6489232572	0.98719	0.9578	0.51234	21675958	92.64	4.36	3
PRD		2	43338328	6500749200	43294658	6482966772	0.98743	0.95849	0.50875	21647329	92.16	4.9	2.94
PRD		3	43367350	6505102500	43333780	6491876708	0.9854	0.95221	0.51457	21666890	92.97	3.94	3.09
PEG	PEG0/100	1	43381242	6507186300	43333388	6490375304	0.98601	0.95466	0.52081	21666694	93.28	3.9	2.82
PEG		2	43390378	6508556700	43347342	6493268844	0.98794	0.9601	0.50394	21673671	92.54	4.72	2.74
PEG		3	43351118	6502667700	43308140	6467334062	0.98838	0.96202	0.51275	21654070	92.91	4.18	2.91
PRD	PRD50/50	1	43365910	6504886500	43331728	6487601144	0.9874	0.95893	0.50451	21665864	91.39	5.54	3.07
PRD		2	43364876	6504731400	43321038	6481247422	0.98894	0.96356	0.4963	21660519	77.62	16.41	5.97
PRD		3	43345888	6501883200	43317212	6489485634	0.98963	0.96461	0.50454	21658606	91.65	5.46	2.89
