# Supplementary material for: Partial root-zone drying combined with nitrogen treatments mitigates drought responses in rice
Source: Front Plant Sci. 2024 Apr 15;15:1381491. doi: 10.3389/fpls.2024.1381491 (PMC11056961; doi:10.3389/fpls.2024.1381491)
Supplement: Supplementary file 5 [file Table_5.xlsx]

## Sheet: Sheet1
ID	Description	GeneRatio	BgRatio	pvalue	p.adjust	qvalue	geneID	Count
ko00630	Glyoxylate and dicarboxylate metabolism	11/210	95/6101	0.000380923	0.0388541	0.0372903	Os03g0223400 /Os02g0170100/Os01g0791033/Os04g0404800/Os02g0735200/Os12g0207600/Os07g0630800/Os05g0160000/Os01g0711400/Os08g0191100/Os10g0356000	11
ko00500	Starch and sucrose metabolism	16/210	201/6101	0.00143076	0.0729687	0.0700319	Os04g0409200/Os08g0409100/Os05g0366600/Os09g0465600/Os03g0758100/Os02g0528200/Os01g0264100/Os06g0232200/Os04g0624600/Os06g0160700/Os04g0403300/Os07g0197100/Os04g0249500/Os10g0521000/Os02g0744700/Os07g0543100	16
ko00195	Photosynthesis	9/210	93/6101	0.00448329	0.152432	0.146297	Os02g0578400/Os03g0659200/Os08g0104600/Os04g0412200/novel3222/Os10g0461400/Os08g0119800/Os07g0105600/novel680	9
ko00910	Nitrogen metabolism	5/210	43/6101	0.0153086	0.390369	0.374658	Os03g0223400/Os01g0639900/Os02g0735200/Os08g0468700/Os01g0640000	5
ko00640	Propanoate metabolism	4/210	35/6101	0.0310073	0.529876	0.50855	Os04g0404800/Os05g0295300/Os06g0346300/Os05g0160000	4
ko00230	Purine metabolism	8/210	114/6101	0.0421537	0.529876	0.50855	Os12g0548300/Os04g0680400/Os05g0104650/Os10g0457500/Os01g0873100/Os02g0613900/Os08g0326000/Os11g0216000	8
ko00620	Pyruvate metabolism	8/210	114/6101	0.0421537	0.529876	0.50855	Os06g0264700/Os04g0404800/Os05g0295300/Os07g0630800/Os05g0160000/Os11g0216000/Os05g0186300/Os02g0647900	8
ko04070	Phosphatidylinositol signaling system	7/210	96/6101	0.0467538	0.529876	0.50855	Os02g0822500/Os11g0209700/Os06g0691600/Os08g0428900/Os03g0425300/Os08g0450700/Os08g0104700	7
							Genes up-regulated in PRD50/50 treatment in red, down-regulated in PRD0/100 treatment in green
