# Supplementary material for: Partial root-zone drying combined with nitrogen treatments mitigates drought responses in rice
Source: Front Plant Sci. 2024 Apr 15;15:1381491. doi: 10.3389/fpls.2024.1381491 (PMC11056961; doi:10.3389/fpls.2024.1381491)
Supplement: Supplementary file 6 [file Table_6.xlsx]

## Sheet: Sheet1
ID	classify	Description	GeneRatio	BgRatio	pvalue	p.adjust	qvalue	geneID	Count
GO:0097573	Molecular function	glutathione oxidoreductase activity	4/780	40/23283	0.0440729	0.554043	0.53443	Os01g0368900/Os12g0538700/Os01g0829400/Os11g0655900	4
GO:0042542	Biological process	response to hydrogen peroxide	3/780	25/23283	0.0498373	0.554043	0.53443	Os04g0482300/Os12g0548300/Os06g0253100	3

## Sheet: Sheet2
GeneID	treatment	control	baseMeanA	baseMeanB	baseMean	log2FoldChange	lfcSE	stat	pvalue	padj	diffType
Os01g0368900	PRD50/50	PRD0/100	1804.6	364.539	1084.57	2.30723	0.308326	7.48308	7.26012e-14	1.00464e-10	Up
Os12g0538700	PRD50/50	PRD0/100	989.065	345.065	667.065	1.5186	0.343203	4.42478	9.65395e-06	0.000487047	Up
Os01g0829400	PRD50/50	PRD0/100	99.0588	33.4222	66.2405	1.55987	0.414678	3.76165	0.000168797	0.0036784	Up
Os11g0655900	PRD50/50	PRD0/100	513.737	179.413	346.575	1.51712	0.447375	3.39115	0.000695998	0.00942906	Up
Os04g0482300	PRD50/50	PRD0/100	108.972	333.611	221.292	-1.60579	0.224528	-7.15186	8.56093e-13	9.21394e-10	Down
Os12g0548300	PRD50/50	PRD0/100	1006.35	463.917	735.135	1.11592	0.181519	6.14766	7.86333e-10	3.38525e-07	Up
Os06g0253100	PRD50/50	PRD0/100	111.601	51.9763	81.7885	1.09685	0.411091	2.66814	0.00762733	0.0461606	Up
