# Supplementary material for: Partial root-zone drying combined with nitrogen treatments mitigates drought responses in rice
Source: Front Plant Sci. 2024 Apr 15;15:1381491. doi: 10.3389/fpls.2024.1381491 (PMC11056961; doi:10.3389/fpls.2024.1381491)
Supplement: Supplementary file 7 [file Table_7.xlsx]

## Sheet: Sheet1
ID	Description	GeneRatio	BgRatio	pvalue	p.adjust	qvalue	geneID	Count
ko00500	Starch and sucrose metabolism	16/210	201/6101	0.00143076	0.0729687	0.0700319	Os04g0409200/Os08g0409100/Os05g0366600/Os09g0465600/Os03g0758100/Os02g0528200/Os01g0264100/Os06g0232200/Os04g0624600/Os06g0160700/Os04g0403300/Os07g0197100/Os04g0249500/Os10g0521000/Os02g0744700/Os07g0543100	16

## Sheet: Sheet2
GeneID	treatment	control	baseMeanA	baseMeanB	baseMean	log2FoldChange	lfcSE	stat	pvalue	padj	diffType
Os04g0409200	PRD50/50	PRD0/100	140.283	794.998	467.64	-2.49813	0.447906	-5.57736	2.4419e-08	5.03264e-06	Down
Os08g0409100	PRD50/50	PRD0/100	450.494	1132	791.248	-1.32707	0.261881	-5.06743	4.03216e-07	4.19973e-05	Down
Os05g0366600	PRD50/50	PRD0/100	26.118	106.414	66.2661	-2.01569	0.445659	-4.52294	6.09872e-06	0.000343461	Down
Os09g0465600	PRD50/50	PRD0/100	1478.38	3023.49	2250.93	-1.03138	0.240253	-4.2929	1.76354e-05	0.000762634	Down
Os03g0758100	PRD50/50	PRD0/100	885.118	1787.2	1336.16	-1.01266	0.247679	-4.08862	4.33951e-05	0.00146083	Down
Os02g0528200	PRD50/50	PRD0/100	42.3133	118.411	80.3623	-1.46889	0.377098	-3.89526	9.80935e-05	0.00253114	Down
Os01g0264100	PRD50/50	PRD0/100	139.95	62.9979	101.474	1.14876	0.314054	3.65783	0.000254363	0.00479356	Up
Os06g0232200	PRD50/50	PRD0/100	237.227	66.1932	151.71	1.83784	0.533372	3.44571	0.00056957	0.00827778	Up
Os04g0624600	PRD50/50	PRD0/100	492.573	1036.02	764.294	-1.07166	0.316687	-3.38398	0.000714431	0.00959858	Down
Os06g0160700	PRD50/50	PRD0/100	133.455	381.357	257.406	-1.51155	0.450411	-3.35593	0.000790977	0.0103262	Down
Os04g0403300	PRD50/50	PRD0/100	131.54	33.0537	82.297	1.98751	0.631022	3.14967	0.00163457	0.0167543	Up
Os07g0197100	PRD50/50	PRD0/100	14.7699	39.8348	27.3023	-1.41033	0.469466	-3.00412	0.00266354	0.023067	Down
Os04g0249500	PRD50/50	PRD0/100	170.36	37.7322	104.046	2.1708	0.734078	2.95718	0.00310465	0.0255724	Up
Os10g0521000	PRD50/50	PRD0/100	28.0503	103.284	65.6674	-1.87226	0.642581	-2.91366	0.00357221	0.0280947	Down
Os02g0744700	PRD50/50	PRD0/100	146.985	639.487	393.236	-2.11929	0.741853	-2.85675	0.00428003	0.0315514	Down
Os07g0543100	PRD50/50	PRD0/100	25.9926	88.9166	57.4546	-1.76186	0.636811	-2.76669	0.00566279	0.0381186	Down
