# Supplementary material for: Partial root-zone drying combined with nitrogen treatments mitigates drought responses in rice
Source: Front Plant Sci. 2024 Apr 15;15:1381491. doi: 10.3389/fpls.2024.1381491 (PMC11056961; doi:10.3389/fpls.2024.1381491)
Supplement: Supplementary file 9 [file Table_9.xlsx]

## Sheet: Sheet1
ID	classify	Description	GeneRatio	BgRatio	pvalue	p.adjust	qvalue	geneID	Count
GO:0009735	Biological process	response to cytokinin	2/780	10/23283	0.0421982	0.554043	0.53443	Os02g0557800/Os11g0143300	2
GO:0009736	Biological process	cytokinin-activated signaling pathway	4/780	41/23283	0.0475928	0.554043	0.53443	Os05g0521300/Os02g0557800/Os11g0143300/Os12g0139400	4

## Sheet: Sheet2
GeneID	treatment	control	baseMeanA	baseMeanB	baseMean	log2FoldChange	lfcSE	stat	pvalue	padj	diffType
Os02g0557800	PRD50/50	PRD0/100	1997.47	810.849	1404.16	1.30041	0.237583	5.47351	4.4122e-08	7.70067e-06	Up
Os11g0143300	PRD50/50	PRD0/100	1513.48	674.341	1093.91	1.16646	0.35245	3.30959	0.000934338	0.0114854	Up
Os05g0521300	PRD50/50	PRD0/100	316.02	804.849	560.435	-1.34687	0.226641	-5.94273	2.8032e-09	8.90269e-07	Down
Os12g0139400	PRD50/50	PRD0/100	999.133	488.839	743.986	1.03209	0.313612	3.29097	0.000998408	0.0120138	Up
