# Supplementary material for: Partial root-zone drying combined with nitrogen treatments mitigates drought responses in rice
Source: Front Plant Sci. 2024 Apr 15;15:1381491. doi: 10.3389/fpls.2024.1381491 (PMC11056961; doi:10.3389/fpls.2024.1381491)
Supplement: Supplementary file 10 [file Table_10.xlsx]

## Sheet: Sheet1
ID	classify	Description	GeneRatio	BgRatio	pvalue	p.adjust	qvalue	geneID	Count
GO:0015979	Biological Process	photosynthesis	9/780	99/23283	0.00600349	0.198468	0.191442	Os03g0343900/Os02g0578400/Os01g0791033/Os01g0279100/Os03g0323200/Os08g0504500/Os10g0461400/Os08g0119800/Os07g0105600	9
GO:0009523	Cellular Component	photosystem II	5/780	36/23283	0.00664009	0.207318	0.199979	Os03g0343900/Os07g0562700/novel3222/Os08g0119800/novel680	5
GO:0009535	Cellular Component	chloroplast thylakoid membrane	10/780	152/23283	0.0322531	0.554043	0.53443	Os06g0484500/Os10g0567400/Os07g0562700/Os10g0536500/Os05g0334000/Os06g0196300/Os10g0395200/Os05g0333500/Os09g0306650上/Os06g0229066	10
GO:0009534	Cellular component	chloroplast thylakoid	3/780	22/23283	0.035908	0.554043	0.53443	Os08g0119800/Os03g0856500/Os06g0229066	3
GO:0031969	Cellular component	chloroplast membrane	5/780	56/23283	0.039114	0.554043	0.53443	Os10g0567400/Os03g0308800/Os03g0323200/Os03g0684400/Os01g0826900	5

## Sheet: Sheet2
GeneID	treatment	control	baseMeanA	baseMeanB	baseMean	log2FoldChange	lfcSE	stat	pvalue	padj	diffType
Os03g0343900	PRD50/50	PRD0/100	7577.09	3717.28	5647.18	1.02724	0.16925	6.06935	1.28426e-09	5.35961e-07	Up
Os02g0578400	PRD50/50	PRD0/100	4535.9	1086.61	2811.25	2.06125	0.383835	5.37014	7.86748e-08	1.20966e-05	Up
Os01g0791033	PRD50/50	PRD0/100	516.668	176.734	346.701	1.54571	0.30279	5.1049	3.30973e-07	3.56219e-05	Up
Os01g0279100	PRD50/50	PRD0/100	7961.59	20770.1	14365.8	-1.38328	0.293178	-4.71821	2.37931e-06	0.000164623	Down
Os03g0323200	PRD50/50	PRD0/100	12998.2	26824.1	19911.1	-1.04518	0.222431	-4.69892	2.61542e-06	0.000174719	Down
Os08g0504500	PRD50/50	PRD0/100	3116.07	1445.52	2280.79	1.10769	0.277824	3.987	6.69145e-05	0.00198824	Up
Os10g0461400	PRD50/50	PRD0/100	210.686	46.6841	128.685	2.17042	0.585238	3.70862	0.000208393	0.00419667	Up
Os08g0119800	PRD50/50	PRD0/100	7157.37	3437.4	5297.38	1.05795	0.286191	3.69665	0.000218462	0.00432747	Up
Os07g0105600	PRD50/50	PRD0/100	10091.7	4374.13	7232.89	1.20595	0.331216	3.64099	0.000271596	0.00503236	Up
Os07g0562700	PRD50/50	PRD0/100	10845.7	28247	19546.4	-1.3809	0.255046	-5.41433	6.15186e-08	9.84959e-06	Down
Os06g0484500	PRD50/50	PRD0/100	793.199	343.857	568.528	1.20471	0.198957	6.05512	1.40315e-09	5.54759e-07	Up
Os10g0567400	PRD50/50	PRD0/100	2269.31	7494.27	4881.79	-1.72319	0.317793	-5.42237	5.88151e-08	9.65614e-06	Down
Os10g0536500	PRD50/50	PRD0/100	13636.1	3892.82	8764.44	1.80845	0.368805	4.90355	9.41181e-07	7.99773e-05	Up
Os05g0334000	PRD50/50	PRD0/100	234.101	821.079	527.59	-1.80745	0.386334	-4.67846	2.89035e-06	0.000188534	Down
Os06g0196300	PRD50/50	PRD0/100	7753.52	3513.93	5633.73	1.14157	0.275798	4.13914	3.48611e-05	0.00125532	Up
Os10g0395200	PRD50/50	PRD0/100	2348.07	1024.4	1686.24	1.19608	0.300245	3.98368	6.78548e-05	0.00200389	Up
Os05g0333500	PRD50/50	PRD0/100	410.962	1197.02	803.993	-1.54047	0.400573	-3.84567	0.000120225	0.00290413	Down
Os09g0306650	PRD50/50	PRD0/100	1296.72	623.853	960.287	1.0545	0.287155	3.67222	0.000240457	0.0046091	Up
Os06g0229066	PRD50/50	PRD0/100	6.50539	29.2771	17.8912	-2.1584	0.709601	-3.0417	0.00235244	0.0212559	Down
Os03g0856500	PRD50/50	PRD0/100	51181.4	24014.4	37597.9	1.0917	0.351336	3.10727	0.00188821	0.0184098	Up
Os03g0308800	PRD50/50	PRD0/100	631.329	1490.43	1060.88	-1.23826	0.252554	-4.90294	9.44147e-07	7.99773e-05	Down
Os03g0684400	PRD50/50	PRD0/100	120.509	365.431	242.97	-1.59742	0.343974	-4.64402	3.41686e-06	0.000213532	Down
Os01g0826900	PRD50/50	PRD0/100	90.6784	206.076	148.377	-1.18058	0.370677	-3.18494	0.00144783	0.0153945	Down
Os03g0659200	PRD50/50	PRD0/100	2436.11	880.375	1658.24	1.46781	0.333994	4.39472	1.10916e-05	0.000541254	Up
Os08g0104600	PRD50/50	PRD0/100	24671.3	11246.4	17958.8	1.13333	0.268805	4.21619	2.48466e-05	0.000972432	Up
Os04g0412200	PRD50/50	PRD0/100	443.01	164.22	303.615	1.42885	0.343938	4.15437	3.26183e-05	0.0011907	Up
